# Supplementary material for: Central Composite Design for Formulation and Optimization of Solid Lipid Nanoparticles to Enhance Oral Bioavailability of Acyclovir
Source: MDPI journal article supplement (doi:10.3390/molecules26185432), 2021-09-07
Supplement: s1 [file s1]

# Central Composite Design for Formulation and Optimization of Solid Lipid Nanoparticles to Enhance Oral Bioavailability of Acyclovir

Haniza Hassan <sup>1,\*</sup>, Siti Khadijah Adam <sup>1</sup>, Ekram Alias <sup>2</sup>, Meor Mohd Redzuan Meor Mohd Affandi <sup>3</sup>, Ahmad Fuad Shamsuddin <sup>4</sup> and Rusliza Basir <sup>1</sup>

<sup>1</sup> Department of Human Anatomy, Faculty of Medicine and Health Sciences, University Putra Malaysia (UPM), Serdang 43400, Selangor, Malaysia; sk.adam@upm.edu.my (S.K.A.); rusliza@upm.edu.my (R.B.)

<sup>2</sup> UKM Medical Centre, Department of Biochemistry, Faculty of Medicine, Universiti Kebangsaan Malaysia, Jalan Yaakob Latiff, Bandar Tun Razak 56000, Kuala Lumpur, Malaysia; ekram.alias@ppukm.ukm.edu.my

<sup>3</sup> School of Pharmacy, Puncak Alam Campus, Universiti Teknologi MARA (UiTM), Bandar Puncak Alam 42300, Selangor, Malaysia; meor@uitm.edu.my

<sup>4</sup> Faculty of Pharmacy and Health Sciences, Universiti Kuala Lumpur Royal College of Medicine Perak, 30450 Ipoh, Perak, Malaysia; fuad.shamsuddin@unikl.edu.my

\* Correspondence: nizahassan@upm.edu.my Tel.: +60-3-97692665

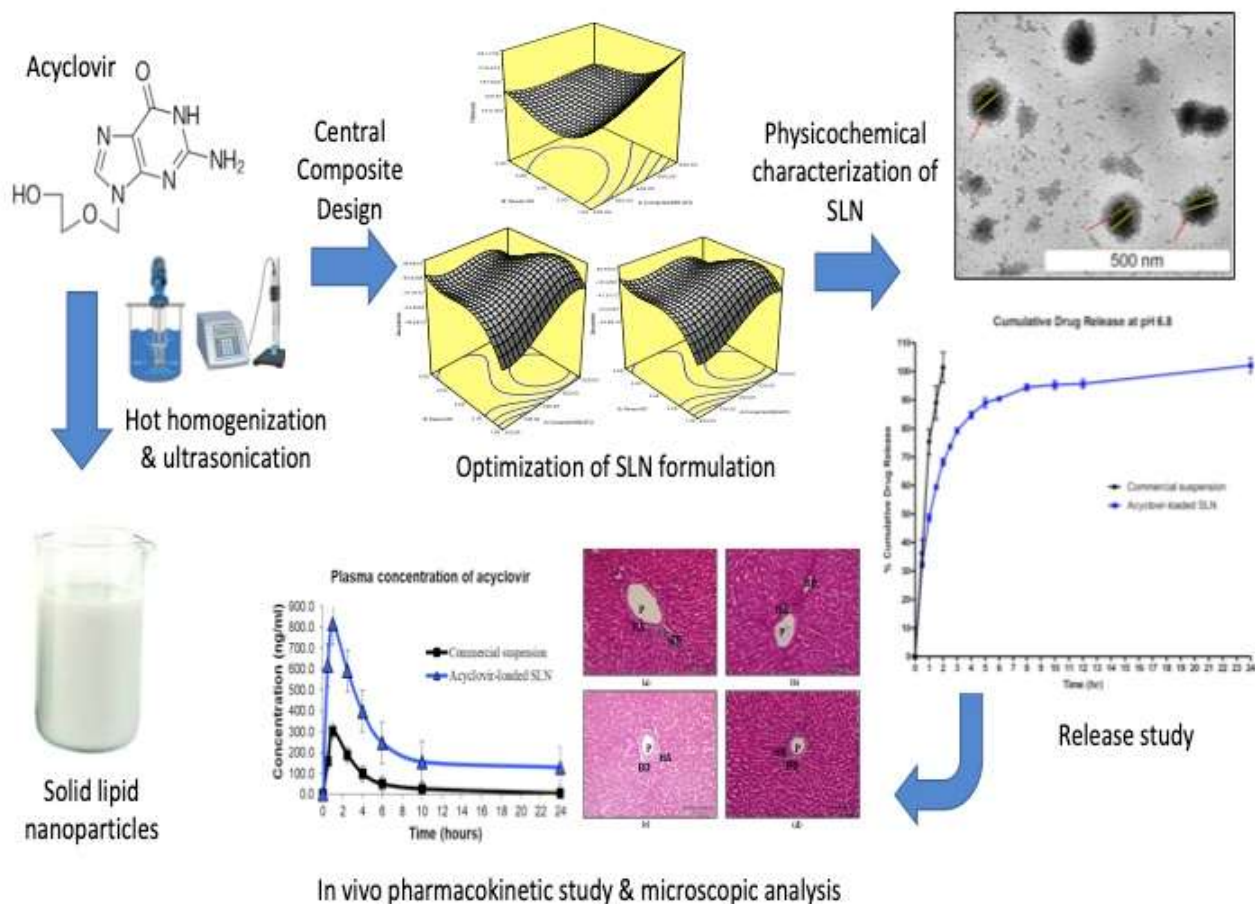

Figure S1. Overview of experiment workflow.
